# Supplementary material for: RFC2: a prognosis biomarker correlated with the immune signature in diffuse lower-grade gliomas
Source: PubMed Central journal article supplement (PMC8873322; doi:10.1038/s41598-022-06197-5), 2022-02-24
Supplement: 41598_2022_6197_MOESM1_ESM.pdf [file 41598_2022_6197_MOESM1_ESM.pdf]

**Title : RFC2: A prognosis biomarker correlated with the immune signature in diffuse lower-grade gliomas**

**Author details:**

Xu Zhao, Department of Radiation Oncology, The First Affiliated Hospital of Xi'an Jiaotong University, Xi'an, Shaanxi, 710061, China. e-mail: [zx19890305@stu.xjtu.edu.cn](mailto:zx19890305@stu.xjtu.edu.cn);

Yuzhu Wang, Department of Radiation Oncology, The First Affiliated Hospital of Xi'an Jiaotong University, Xi'an, Shaanxi, 710061, China. e-mail: [wyz960426@163.com](mailto:wyz960426@163.com);

Jing Li, Department of Radiation Oncology, The First Affiliated Hospital of Xi'an Jiaotong University, Xi'an, Shaanxi, 710061, China. e-mail: [lijing8656@stu.xjtu.edu.cn](mailto:lijing8656@stu.xjtu.edu.cn);

Fengyi Qu, Department of Radiation Oncology, The First Affiliated Hospital of Xi'an Jiaotong University, Xi'an, Shaanxi, 710061, China. e-mail: [vesper@stu.xjtu.edu.cn](mailto:vesper@stu.xjtu.edu.cn);

Xing Fu, Department of Radiation Oncology, The First Affiliated Hospital of Xi'an Jiaotong University, Xi'an, Shaanxi, 710061, China. e-mail: [1977349604@qq.com](mailto:1977349604@qq.com);

Siqi Liu, Department of Radiation Oncology, The First Affiliated Hospital of Xi'an Jiaotong University, Xi'an, Shaanxi, 710061, China. e-mail: [842401659@qq.com](mailto:842401659@qq.com);

Xuan Wang, Department of Radiation Oncology, The First Affiliated Hospital of Xi'an Jiaotong University, Xi'an, Shaanxi, 710061, China. e-mail: [1162947000@qq.com](mailto:1162947000@qq.com);

Yuchen Xie, Department of Radiation Oncology, The First Affiliated Hospital of Xi'an Jiaotong University, Xi'an, Shaanxi, 710061, China. e-mail: [809585640@qq.com](mailto:809585640@qq.com);

Corresponding Author: Xiaozhi Zhang, Department of Radiation Oncology, The First Affiliated Hospital of Xi'an Jiaotong University, No.277, Yanta West Road, 710061, Xi'an, Shaanxi, China.

e-mail: [zhangxiaozhi@xjtu.edu.cn](mailto:zhangxiaozhi@xjtu.edu.cn)

Supplementary Table S1. Correlation between RFC2 expression and immune checkpoint genes in LGG

| <i>Immune checkpoint genes</i> | <i>Spearman correlation (R value)</i> | <i>P-value</i> |
|--------------------------------|---------------------------------------|----------------|
| PD-1                           | 0.30                                  | 4.2e-13        |
| PD-L1                          | 0.49                                  | 3.6e-06        |
| PD-L2                          | 0.29                                  | 1.1e-11        |
| B7-H2                          | 0.19                                  | 5.2e-05        |
| CTLA4                          | 0.18                                  | 3.1e-05        |

LGG, Diffuse lower-grade gliomas.

Supplementary Table S2. Clinical data of patients with LGG and benign brain tumor

| <i>Clinicopathological factor</i>  | <i>LGG (n=69)</i> | <i>Benign brain tumor (n=10)</i> |
|------------------------------------|-------------------|----------------------------------|
| <b>Age (years)</b>                 |                   |                                  |
| Mean age (years)                   | 45.2±10.4         | 50.6±10.2                        |
| Median age (years)                 | 46                | 50.5                             |
| <b>Gender</b>                      |                   |                                  |
| Male                               | 35                | 2                                |
| Female                             | 34                | 8                                |
| <b>WHO grade</b>                   |                   |                                  |
| Grade I                            | 0                 | 10                               |
| Grade II                           | 30                | 0                                |
| Grade III                          | 39                | 0                                |
| <b>Pathological classification</b> |                   |                                  |
| Astrocytoma                        | 44                | 0                                |
| Oligodendroglioma                  | 20                | 0                                |
| Mixed glioma                       | 5                 | 0                                |
| Benign meningioma                  | 0                 | 7                                |
| Schwannoma                         | 0                 | 3                                |
| <b>Treatments history</b>          |                   |                                  |
| Surgery only                       | 11                | 10                               |
| Surgery + radiotherapy             | 17                | 0                                |
| Surgery + chemotherapy             | 14                | 0                                |
| Surgery + chemoradiotherapy        | 27                | 0                                |
| <b>IDH mutation status</b>         |                   |                                  |
| IDH mutation                       | 26                | 0                                |
| IDH wild-type                      | 28                | 0                                |
| Unknown                            | 15                | 10                               |
| <b>Seizure history</b>             |                   |                                  |
| Yes                                | 35                | 4                                |
| No                                 | 34                | 6                                |

LGG, Diffuse lower-grade gliomas; WHO, World Health Organization.

Supplementary Table S3. Detailed clinical data of patients with LGG and benign brain tumor

| <i>Subjects</i> | <i>Gender</i> | <i>Age (years)</i> | <i>WHO grade</i> | <i>Pathological classification</i> | <i>Time of diagnosis</i> | <i>Surgery</i> | <i>Radiation</i> | <i>Chemotherapy</i> | <i>IDH mutation</i> | <i>Seizure history</i> |
|-----------------|---------------|--------------------|------------------|------------------------------------|--------------------------|----------------|------------------|---------------------|---------------------|------------------------|
| 0893032         | MALE          | 41                 | WHO II           | Oligodendroglioma                  | Feb-13                   | YES            | YES              | NO                  | UNKNOWN             | YES                    |
| 0892976         | FEMALE        | 63                 | WHO III          | Astrocytoma                        | Apr-13                   | YES            | YES              | YES                 | NO                  | NO                     |
| 0897478         | FEMALE        | 40                 | WHO II           | Astrocytoma                        | May-13                   | YES            | YES              | YES                 | NO                  | NO                     |
| 0903584         | MALE          | 46                 | WHO III          | Astrocytoma                        | Jun-13                   | YES            | YES              | NO                  | NO                  | YES                    |
| 0971506         | FEMALE        | 40                 | WHO III          | Oligodendroglioma                  | Jul-13                   | YES            | YES              | YES                 | YES                 | NO                     |
| 1705404         | MALE          | 39                 | WHO II           | Mixed glioma                       | Nov-13                   | YES            | NO               | NO                  | YES                 | YES                    |
| 1057091         | FEMALE        | 48                 | WHO III          | Astrocytoma                        | Feb-14                   | YES            | YES              | NO                  | NO                  | YES                    |
| 1425317         | FEMALE        | 46                 | WHO II           | Astrocytoma                        | Mar-14                   | YES            | YES              | NO                  | NO                  | NO                     |
| 1166153         | FEMALE        | 18                 | WHO II           | Astrocytoma                        | Mar-14                   | YES            | YES              | YES                 | NO                  | YES                    |
| 0995481         | MALE          | 54                 | WHO II           | Astrocytoma                        | Apr-14                   | YES            | NO               | NO                  | NO                  | NO                     |
| 1179427         | FEMALE        | 51                 | WHO II           | Astrocytoma                        | Jun-14                   | YES            | YES              | YES                 | UNKNOWN             | NO                     |
| 1022939         | MALE          | 41                 | WHO II           | Oligodendroglioma                  | Jul-14                   | YES            | NO               | NO                  | YES                 | YES                    |
| 1072091         | MALE          | 58                 | WHO III          | Astrocytoma                        | Aug-14                   | YES            | NO               | YES                 | YES                 | NO                     |
| 1141355         | FEMALE        | 50                 | WHO III          | Astrocytoma                        | Aug-14                   | YES            | YES              | NO                  | UNKNOWN             | YES                    |
| 1052710         | FEMALE        | 70                 | WHO II           | Astrocytoma                        | Sep-14                   | YES            | NO               | NO                  | UNKNOWN             | NO                     |
| 1054035         | MALE          | 45                 | WHO III          | Astrocytoma                        | Sep-14                   | YES            | NO               | NO                  | YES                 | NO                     |
| 1104236         | MALE          | 48                 | WHO II           | Astrocytoma                        | Oct-14                   | YES            | NO               | YES                 | YES                 | YES                    |
| 1216845         | FEMALE        | 58                 | WHO II           | Astrocytoma                        | Oct-14                   | YES            | YES              | YES                 | YES                 | YES                    |
| 1126176         | MALE          | 55                 | WHO II           | Astrocytoma                        | Nov-14                   | YES            | YES              | YES                 | NO                  | NO                     |
| 1116867         | MALE          | 52                 | WHO III          | Astrocytoma                        | Nov-14                   | YES            | NO               | YES                 | UNKNOWN             | NO                     |
| 1128780         | FEMALE        | 55                 | WHO III          | Astrocytoma                        | Nov-14                   | YES            | YES              | YES                 | YES                 | NO                     |
| 1136777         | MALE          | 52                 | WHO II           | Astrocytoma                        | Dec-14                   | YES            | YES              | NO                  | YES                 | NO                     |
| 1089330         | FEMALE        | 53                 | WHO III          | Astrocytoma                        | Dec-14                   | YES            | YES              | YES                 | NO                  | NO                     |
| 1191328         | MALE          | 33                 | WHO III          | Oligodendroglioma                  | Dec-14                   | YES            | YES              | YES                 | YES                 | YES                    |
| 1525700         | MALE          | 34                 | WHO II           | Oligodendroglioma                  | Feb-15                   | YES            | YES              | YES                 | UNKNOWN             | NO                     |
| 1507948         | FEMALE        | 33                 | WHO II           | Oligodendroglioma                  | Apr-15                   | YES            | YES              | YES                 | YES                 | NO                     |
| 1524925         | MALE          | 32                 | WHO III          | Astrocytoma                        | Apr-15                   | YES            | YES              | YES                 | NO                  | YES                    |
| 1246781         | FEMALE        | 21                 | WHO III          | Mixed glioma                       | Apr-15                   | YES            | NO               | YES                 | NO                  | YES                    |
| 1526406         | FEMALE        | 63                 | WHO III          | Oligodendroglioma                  | May-15                   | YES            | NO               | YES                 | YES                 | YES                    |
| 1514053         | MALE          | 62                 | WHO III          | Astrocytoma                        | Jul-15                   | YES            | NO               | YES                 | NO                  | YES                    |
| 1521011         | MALE          | 47                 | WHO III          | Astrocytoma                        | Oct-15                   | YES            | YES              | YES                 | UNKNOWN             | NO                     |
| 1528077         | MALE          | 29                 | WHO II           | Astrocytoma                        | Nov-15                   | YES            | YES              | YES                 | NO                  | NO                     |
| 1529782         | FEMALE        | 56                 | WHO III          | Astrocytoma                        | Nov-15                   | YES            | YES              | NO                  | YES                 | YES                    |
| 1529856         | FEMALE        | 45                 | WHO III          | Astrocytoma                        | Nov-15                   | YES            | YES              | YES                 | NO                  | YES                    |
| 1627726         | FEMALE        | 47                 | WHO III          | Oligodendroglioma                  | Jan-16                   | YES            | YES              | YES                 | UNKNOWN             | YES                    |
| 1602468         | FEMALE        | 49                 | WHO III          | Oligodendroglioma                  | Mar-16                   | YES            | YES              | YES                 | NO                  | YES                    |
| 1318011         | MALE          | 47                 | WHO II           | Astrocytoma                        | Mar-16                   | YES            | YES              | YES                 | UNKNOWN             | NO                     |
| 1614542         | FEMALE        | 46                 | WHO III          | Astrocytoma                        | Apr-16                   | YES            | YES              | YES                 | NO                  | NO                     |
| 1618962         | MALE          | 19                 | WHO II           | Mixed glioma                       | May-16                   | YES            | NO               | NO                  | YES                 | YES                    |
| 1603963         | FEMALE        | 22                 | WHO III          | Mixed glioma                       | May-16                   | YES            | NO               | YES                 | YES                 | YES                    |
| 1338136         | MALE          | 42                 | WHO II           | Oligodendroglioma                  | May-16                   | YES            | NO               | NO                  | YES                 | YES                    |
| 1608207         | FEMALE        | 45                 | WHO III          | Astrocytoma                        | Jul-16                   | YES            | YES              | NO                  | NO                  | YES                    |
| 1620562         | FEMALE        | 46                 | WHO III          | Astrocytoma                        | Oct-16                   | YES            | YES              | NO                  | UNKNOWN             | NO                     |
| 1631230         | MALE          | 34                 | WHO II           | Astrocytoma                        | Dec-16                   | YES            | YES              | YES                 | YES                 | NO                     |
| 1612120         | FEMALE        | 43                 | WHO III          | Oligodendroglioma                  | Dec-16                   | YES            | YES              | NO                  | YES                 | NO                     |
| 1718726         | MALE          | 37                 | WHO II           | Oligodendroglioma                  | Feb-17                   | YES            | NO               | YES                 | YES                 | NO                     |
| 1701459         | FEMALE        | 61                 | WHO III          | Astrocytoma                        | Feb-17                   | YES            | YES              | NO                  | UNKNOWN             | YES                    |
| 1700259         | MALE          | 49                 | WHO III          | Oligodendroglioma                  | Feb-17                   | YES            | NO               | YES                 | NO                  | YES                    |
| 1701115         | FEMALE        | 55                 | WHO II           | Astrocytoma                        | Mar-17                   | YES            | YES              | NO                  | YES                 | NO                     |
| 1732393         | MALE          | 46                 | WHO II           | Astrocytoma                        | May-17                   | YES            | YES              | NO                  | NO                  | NO                     |
| 1700541         | MALE          | 54                 | WHO III          | Mixed glioma                       | May-17                   | YES            | YES              | NO                  | YES                 | YES                    |
| 1397071         | FEMALE        | 30                 | WHO I            | Schwannoma                         | May-17                   | YES            | NO               | NO                  | UNKNOWN             | NO                     |
| 1710002         | MALE          | 45                 | WHO II           | Astrocytoma                        | Jun-17                   | YES            | NO               | YES                 | YES                 | YES                    |
| 1732065         | MALE          | 39                 | WHO II           | Oligodendroglioma                  | Jun-17                   | YES            | NO               | YES                 | NO                  | NO                     |
| 1421257         | FEMALE        | 47                 | WHO III          | Astrocytoma                        | Jun-17                   | YES            | YES              | YES                 | YES                 | YES                    |
| 1310257         | MALE          | 46                 | WHO III          | Astrocytoma                        | Jul-17                   | YES            | YES              | YES                 | UNKNOWN             | YES                    |
| 1716600         | MALE          | 41                 | WHO II           | Oligodendroglioma                  | Aug-17                   | YES            | NO               | YES                 | YES                 | NO                     |
| 1436099         | MALE          | 31                 | WHO III          | Astrocytoma                        | Aug-17                   | YES            | YES              | YES                 | NO                  | YES                    |
| 1720885         | MALE          | 46                 | WHO III          | Oligodendroglioma                  | Sep-17                   | YES            | YES              | YES                 | NO                  | YES                    |
| 1736588         | MALE          | 49                 | WHO III          | Astrocytoma                        | Oct-17                   | YES            | YES              | NO                  | NO                  | NO                     |
| 1712584         | MALE          | 52                 | WHO III          | Oligodendroglioma                  | Nov-17                   | YES            | NO               | NO                  | UNKNOWN             | YES                    |
| 1712826         | MALE          | 54                 | WHO III          | Oligodendroglioma                  | Nov-17                   | YES            | NO               | YES                 | NO                  | NO                     |
| 1738022         | FEMALE        | 36                 | WHO III          | Oligodendroglioma                  | Dec-17                   | YES            | YES              | YES                 | NO                  | NO                     |
| 1443128         | MALE          | 42                 | WHO I            | Benign meningioma                  | Dec-17                   | YES            | NO               | NO                  | UNKNOWN             | YES                    |
| 1386295         | FEMALE        | 61                 | WHO I            | Benign meningioma                  | Dec-17                   | YES            | NO               | NO                  | UNKNOWN             | NO                     |
| 1448208         | FEMALE        | 67                 | WHO I            | Benign meningioma                  | Jan-18                   | YES            | NO               | NO                  | UNKNOWN             | NO                     |
| 1513827         | FEMALE        | 55                 | WHO I            | Schwannoma                         | Jan-18                   | YES            | NO               | NO                  | UNKNOWN             | NO                     |
| 1814879         | FEMALE        | 51                 | WHO III          | Astrocytoma                        | Feb-18                   | YES            | NO               | YES                 | UNKNOWN             | YES                    |
| 1441389         | FEMALE        | 49                 | WHO III          | Astrocytoma                        | Feb-18                   | YES            | NO               | NO                  | NO                  | YES                    |
| 1824897         | FEMALE        | 48                 | WHO III          | Astrocytoma                        | Mar-18                   | YES            | YES              | YES                 | NO                  | NO                     |
| 1461422         | FEMALE        | 47                 | WHO I            | Benign meningioma                  | Mar-18                   | YES            | NO               | NO                  | UNKNOWN             | NO                     |
| 1469919         | FEMALE        | 47                 | WHO I            | Benign meningioma                  | Apr-18                   | YES            | NO               | NO                  | UNKNOWN             | YES                    |
| 1475147         | MALE          | 56                 | WHO I            | Schwannoma                         | Apr-18                   | YES            | NO               | NO                  | UNKNOWN             | NO                     |
| 1479762         | FEMALE        | 49                 | WHO I            | Benign meningioma                  | May-18                   | YES            | NO               | NO                  | UNKNOWN             | YES                    |
| 1810160         | MALE          | 35                 | WHO II           | Astrocytoma                        | Jun-18                   | YES            | NO               | NO                  | YES                 | NO                     |
| 1812853         | FEMALE        | 34                 | WHO II           | Astrocytoma                        | Jul-18                   | YES            | YES              | NO                  | NO                  | YES                    |
| 1823881         | FEMALE        | 46                 | WHO II           | Oligodendroglioma                  | Aug-18                   | YES            | YES              | NO                  | UNKNOWN             | NO                     |
| 1825660         | FEMALE        | 48                 | WHO II           | Astrocytoma                        | Aug-18                   | YES            | NO               | NO                  | YES                 | YES                    |
| 1531418         | FEMALE        | 52                 | WHO I            | Benign meningioma                  | Oct-18                   | YES            | NO               | NO                  | UNKNOWN             | YES                    |

LGG, Diffuse lower-grade gliomas; WHO, World Health Organization.

Supplementary Figure S1.

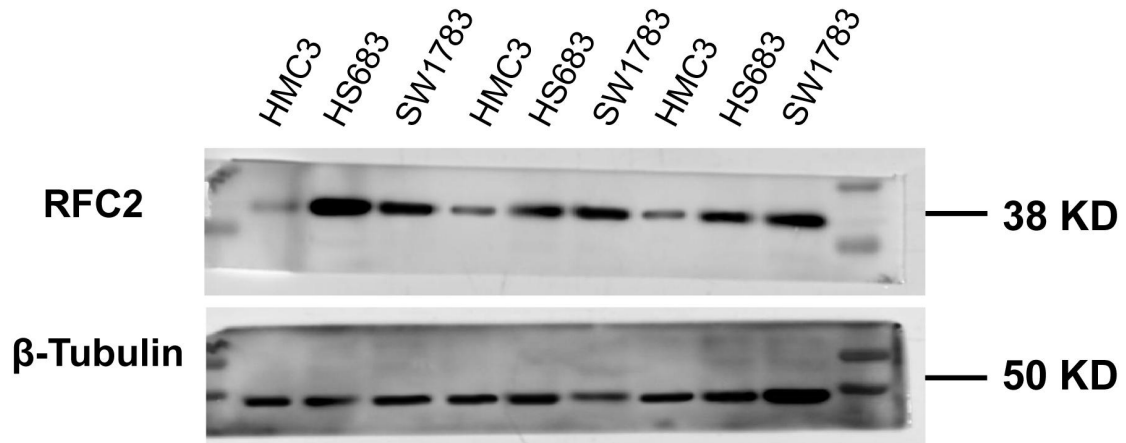

Supplementary Figure S1. The scans of membranes for Western blot images of RFC2 expression in HMC3, HS683, and SW1783 cells respectively corresponding to Fig. 10A.

Supplementary Figure S2.

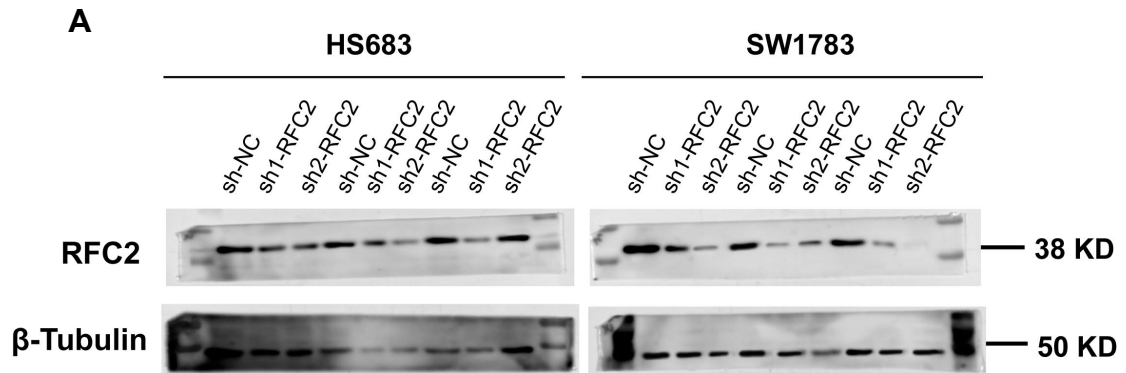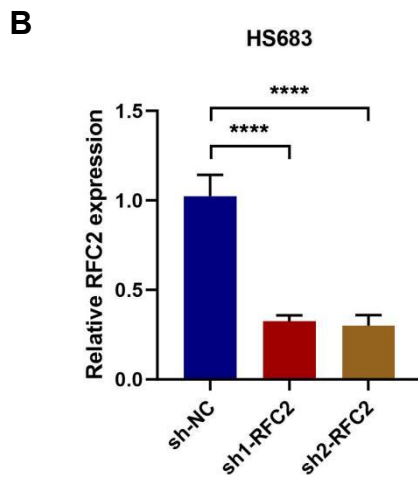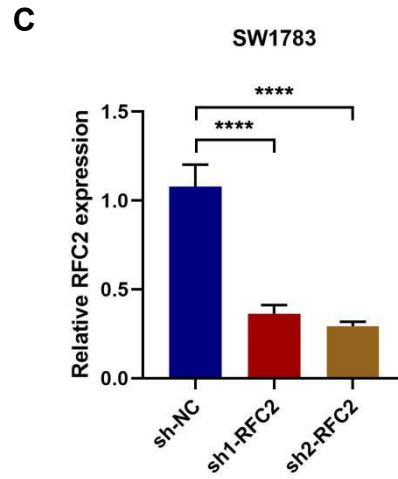

**Supplementary Figure S2.** Western blot and qRT-PCR were used to evaluate the expression levels of RFC2 in HS683 and SW1783 cells. **(A)** The scans of membranes for Western blot images of RFC2 expression in HS683 and SW1783 cells corresponding to Fig. 10C. **(B)** The relative expression of RFC2 in HS683 cells was evaluated by qRT-PCR. **(C)** The relative expression of RFC2 in SW1783 cells was evaluated by qRT-PCR. (\*\*\*\* $P < 0.0001$ ).
